# Supplementary material for: Mesoporous perovskite titanates via hydrothermal conversion
Source: Royal Society of Chemistry journal article supplement (doi:10.1039/d1cc05343d), 2021-12-13
Supplement: d1cc05343d1.pdf [file d1cc05343d1.pdf]

# Mesoporous Perovskite Titanates via Hydrothermal Conversion

Tianyu Li and Efrain E. Rodriguez\*

Department of Chemistry and Biochemistry, University of Maryland,  
College Park, Maryland 20742-2115, USA

## Supplementary Information

### 1. Characterization method

Transmission electron microscopy (TEM) image was taken using JEOL JEM 2100 LaB6 TEM equipment. Powder XRD pattern was recorded on the Bruker D8 Advance diffractometer, with Cu K $\alpha$ /K $\beta$  radiation. Rietveld refinement was performed using TOPAS 5<sup>1</sup>. The nitrogen adsorption isotherms were measured by Micromeritics ASAP 2020 Porosimeter Test Station. Surface area was calculated by applying Brunauer–Emmett–Teller (BET) equation on adsorption data obtained at  $P/P_0$  between 0.05 and 0.35. The pore size distributions were calculated by analyzing the adsorption branch of the N<sub>2</sub> sorption isotherm using the Barret–Joyner–Halenda (BJH) method. X-ray Small angle scattering (SAXS) pattern was collected by Xenocs Xeuss SAXS/WAXS/GISAXS small angle system. TEM image, electron diffraction, XRD and pore size distribution of SrTiO<sub>3</sub> materials synthesized from different method are summarized in **Figure S1**.

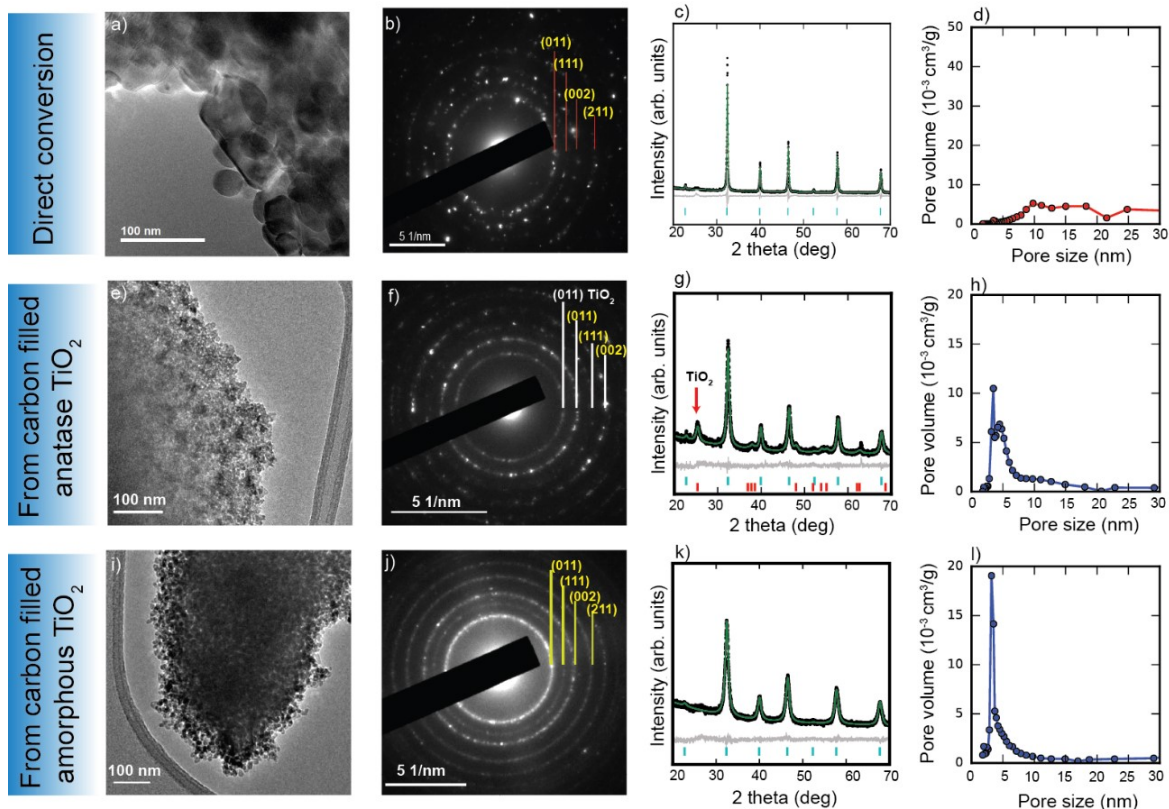

**Figure S1.** TEM image, electron diffraction, XRD and pore size distribution of SrTiO<sub>3</sub> materials synthesized from a)-d) Direct hydrothermal conversion of mesoporous crystalline TiO<sub>2</sub>. e)-h) Hydrothermal conversion of mesoporous crystalline TiO<sub>2</sub> after filling carbon support into pores. i)-l) Hydrothermal conversion of mesoporous amorphous TiO<sub>2</sub> after filling carbon support into pores.

## 2. Synthesis of mesoporous crystalline TiO<sub>2</sub>

Mesoporous crystalline TiO<sub>2</sub> was synthesized via a reported evaporation-induced self-assembly (EISA) method<sup>2</sup>. Typically, 0.8 g of triblock copolymer Pluronic P127 was first added into 12 mL of anhydrous ethanol (EtOH), followed by the addition of 1.2g acetic acid and 1.2 g concentrated hydrochloric acid (HCl, 37%). After stirring for 0.5 h at room temperature, 5 mmol ( $\approx 1.4$  ml) Titanium butoxide Ti(C<sub>4</sub>H<sub>9</sub>O)<sub>4</sub> was slowly added to the solution dropwise. The above solution was under with vigorous stirring for around 3 h. The resulting sol solution was transferred in an open glass container (diameter 2 inch) and was later placed in 40 °C environment and 60 °C environment each for 24 h, allowing the evaporation of the solvent to form gel. The Mesoporous TiO<sub>2</sub> powder was obtained by calcinating the formed gel at 350 °C for 4h (1°C/min ramping) with enough air provided. The basic characterization of mesoporous crystalline TiO<sub>2</sub> is displayed in **Figure S2**.

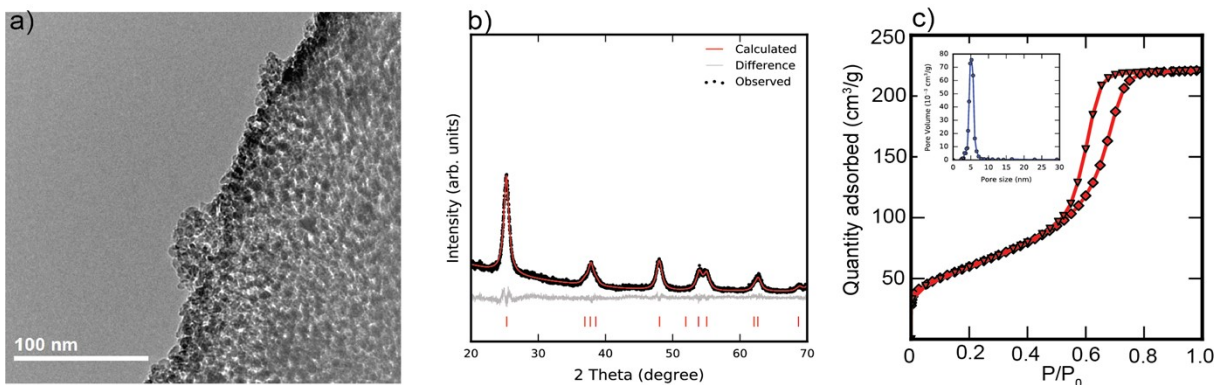

**Figure S2.** TEM (a), XRD with Rietveld refinement (b) and Nitrogen adsorption isotherm (pore size distribution in inset) (c) for mesoporous crystalline TiO<sub>2</sub>.

### 3. Direct hydrothermal conversion of mesoporous crystalline TiO<sub>2</sub> into SrTiO<sub>3</sub>.

0.2g mesoporous crystalline TiO<sub>2</sub> and 0.8g Sr(OH)<sub>2</sub> are mixed in the 15ml water and the mixture undergoes hydrothermal treatment at 200 °C for 24h. The obtained solid is washed first with 5% acetic acid solution for 3 times to remove unreacted Sr(OH)<sub>2</sub> and SrCO<sub>3</sub> then with water for another 3 times. The SrTiO<sub>3</sub> product is dried in air at 80°C. Characterizations are shown in **Figure 1a-d** and **Figure S1a-d**. Nitrogen adsorption isotherm and pore size

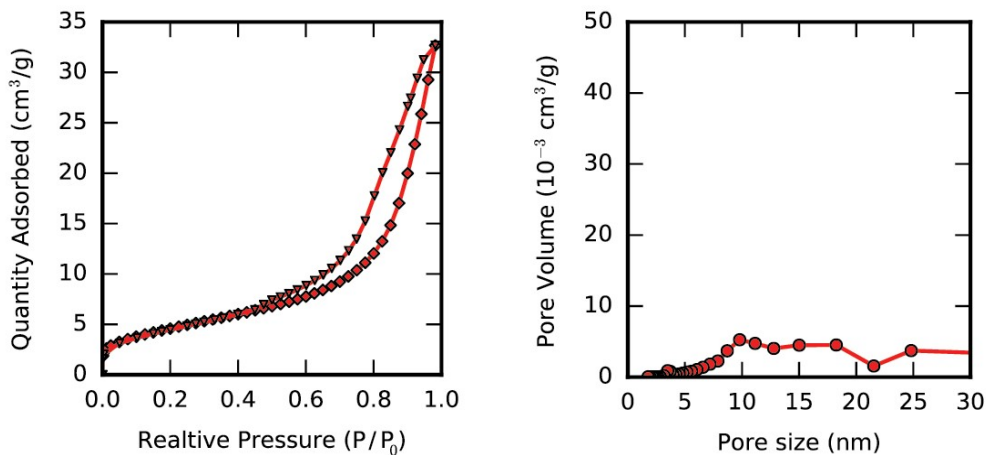

**Figure S3.** (a) Nitrogen adsorption isotherm and pore size distribution for (b) SrTiO<sub>3</sub> from direct hydrothermal conversion of mesoporous crystalline TiO<sub>2</sub>.

distribution are displayed in **Figure S3**.

### 4. Hydrothermal conversion of carbon filled mesoporous crystalline TiO<sub>2</sub> into SrTiO<sub>3</sub>.

4.1 Filling mesoporous crystalline TiO<sub>2</sub> with carbon.

Carbon filling is achieved via an impregnation method. 0.2g mesoporous crystalline TiO<sub>2</sub> is added to a solution obtained by dissolving 0.2g of sucrose and 1 drop of H<sub>2</sub>SO<sub>4</sub> (~0.05 ml) 2

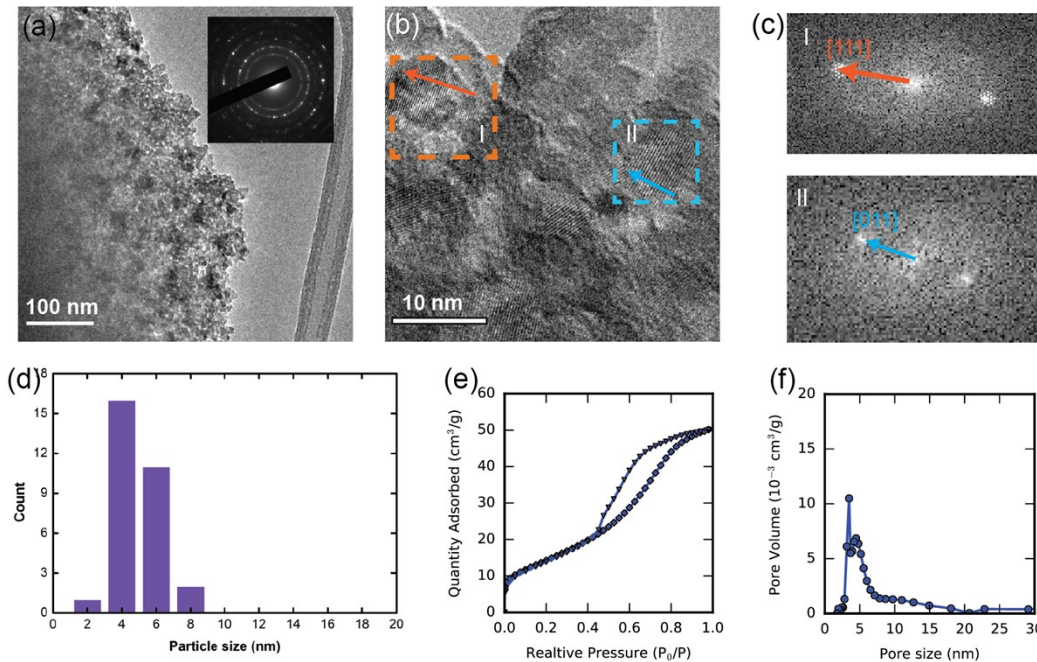

**Figure S4.** (a)TEM, (b) High resolution TEM, (c) Fourier Transform of the High-resolution TEM, (d) grain size distribution, (e) Nitrogen adsorption isotherm and pore size distribution for SrTiO<sub>3</sub> from hydrothermal conversion of carbon filled mesoporous crystalline TiO<sub>2</sub>.

ml H<sub>2</sub>O. After 5 min sonication, the mixture is placed in an oven for 6 h at 100°C. Subsequently, the temperature is increased to 180°C and maintained for another 6 h.

#### 4.2 Conversion of carbon filled mesoporous crystalline TiO<sub>2</sub> into SrTiO<sub>3</sub>.

0.2g carbon filled mesoporous crystalline TiO<sub>2</sub> and 0.8g Sr(OH)<sub>2</sub> are mixed in the 15ml water and the mixture undergoes hydrothermal treatment at 200 °C for 24h. The obtained solid is washed first with 5% acetic acid solution for 3 times to remove unreacted Sr(OH)<sub>2</sub> and SrCO<sub>3</sub> then with water for another 3 times. The product is dried in air at 80°C. The final SrTiO<sub>3</sub> product is obtained after 4h calcination at 450 °C in air to remove the carbon. characterizations are

shown in **Figure 1e-h, S2e-h and S4**. XRD pattern is displayed in **Figure S5a**. Due to the existence of  $\text{TiO}_2$  impurity observed in the sample, we tried to increase the hydrothermal treatment time to 96h. The XRD pattern of resulting samples is shown in **Figure S5b**.

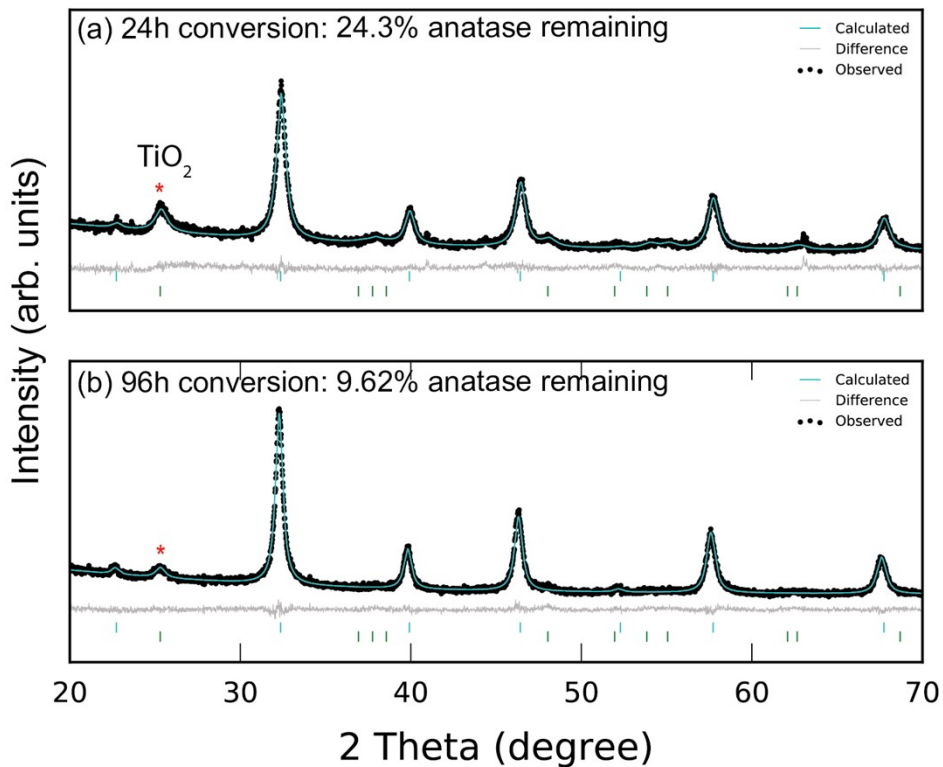

**Figure S5.** XRD with Rietveld refinement for (a)  $\text{SrTiO}_3$  from hydrothermal conversion of carbon filled mesoporous crystalline  $\text{TiO}_2$  for 24h, (b)  $\text{SrTiO}_3$  from hydrothermal conversion of carbon filled mesoporous crystalline  $\text{TiO}_2$  for 96h.

## 5. Synthesis of mesoporous amorphous $\text{TiO}_2$

Mesoporous amorphous  $\text{TiO}_2$  was synthesized via a reported evaporation-induced self-assembly (EISA) method<sup>3</sup>. Typically, 0.8 g of triblock copolymer Pluronic P127 was first added into 12 mL of anhydrous ethanol (EtOH), followed by the addition of 1.2g acetic acid and 1.2 g concentrated hydrochloric acid (HCl 37%). After stirring for 0.5 h at room temperature, 5 mmol ( $\approx 1.4$  ml) Titanium butoxide  $\text{Ti}(\text{C}_4\text{H}_9\text{O})_4$  was slowly added to the solution dropwise. The above solution was under with vigorous stirring for around 3 h. The resulting sol solution was transferred in an open glass container (diameter 2 inch) and was later placed in a 40 °C environment and a 60 °C environment each for 24 h, allowing the evaporation of the solvent to form gel. The Mesoporous  $\text{TiO}_2$  powder was obtained by calcinating the formed

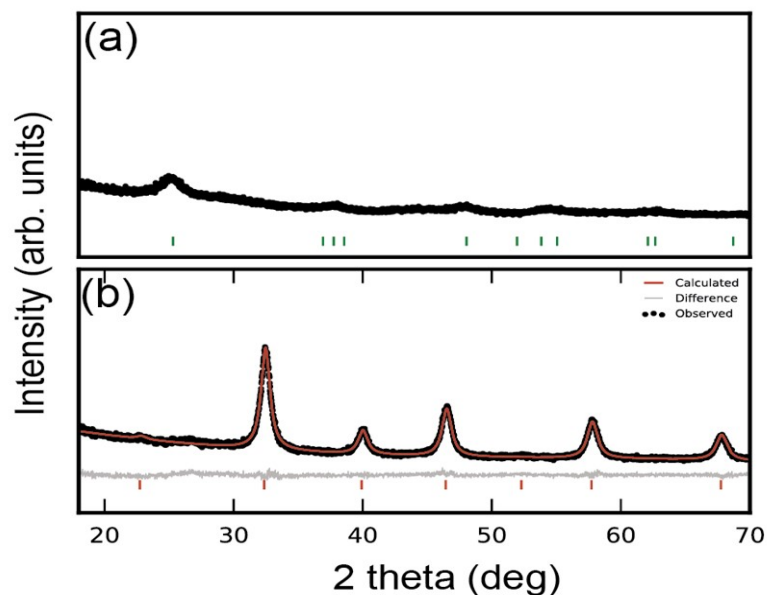

**Figure S6.** XRD with Rietveld refinement for (a) mesoporous amorphous  $\text{TiO}_2$  (b)  $\text{SrTiO}_3$  from hydrothermal conversion of carbon filled mesoporous amorphous  $\text{TiO}_2$  for 24h. No impurity of  $\text{TiO}_2$  is observed. gel at 350 °C for 4h ( $1^\circ\text{C}/\text{min}$  ramping) in the  $\text{N}_2$  flow environment. XRD pattern of the sample is presented in **Figure S6a**. Nitrogen adsorption isotherm and pore size distribution are displayed in **Figure S7** (blue curve).

## 6. Hydrothermal conversion of carbon filled mesoporous amorphous $\text{TiO}_2$ into $\text{SrTiO}_3$

### 6.1 Filling mesoporous amorphous $\text{TiO}_2$ with carbon.

0.2g mesoporous amorphous  $\text{TiO}_2$  is added to a solution obtained by dissolving 0.2g of sucrose and 1 drop of  $\text{H}_2\text{SO}_4$  (~0.05 ml) 2 ml  $\text{H}_2\text{O}$ . After 5 min sonication, the mixture is placed in an oven for 6 h at  $100^\circ\text{C}$ . Subsequently, the temperature is increased to  $180^\circ\text{C}$  and maintained for another 6 h.

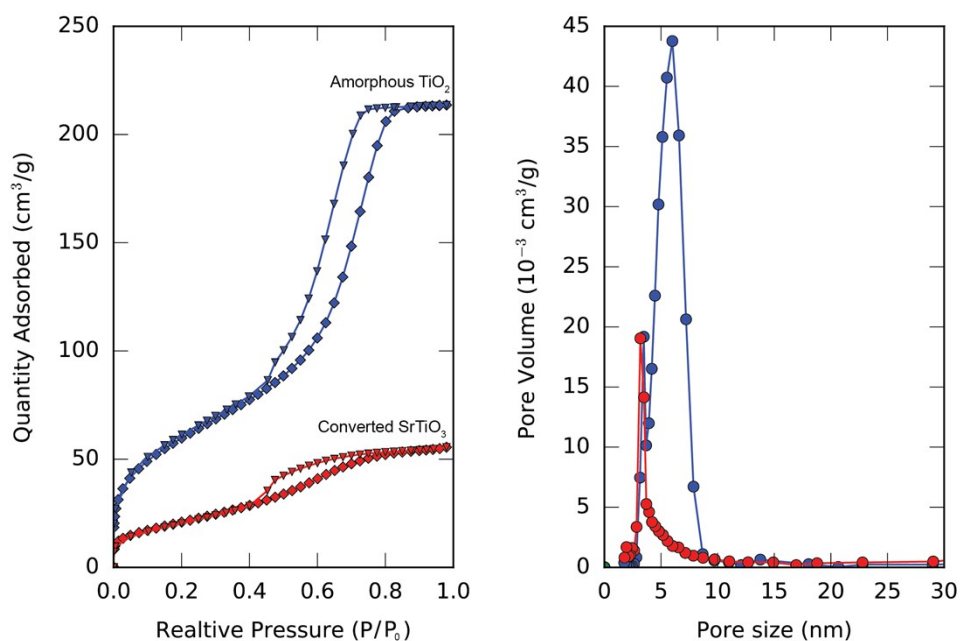

**Figure S7.** Nitrogen adsorption isotherm (left) and pore size distribution(right) of mesoporous amorphous  $\text{TiO}_2$  (blue curve)  $\text{SrTiO}_3$  from hydrothermal conversion of carbon filled mesoporous amorphous  $\text{TiO}_2$  for 24h (red curve).



## 6.2 Conversion of carbon filled mesoporous amorphous $\text{TiO}_2$ into $\text{SrTiO}_3$ .

0.2g carbon filled mesoporous amorphous  $\text{TiO}_2$  and 0.8g  $\text{Sr}(\text{OH})_2$  are mixed in the 15ml water and the mixture undergoes hydrothermal treatment at 200 °C for 24h. The obtained solid is washed first with 5% acetic acid solution for 3 times to remove unreacted  $\text{Sr}(\text{OH})_2$  and  $\text{SrCO}_3$  then with water for another 3 times. The product is dried in air at 80°C. The final  $\text{SrTiO}_3$  product is obtained after 4h calcination at 450 °C in air to remove the carbon. Characterizations are shown in **Figure 1i-I**, **Figure S2i-I** and **Figure S8**. XRD pattern is displayed in **Figure S6a**. Nitrogen adsorption isotherm and pore size distribution are displayed in **Figure S7** (red curve). To verify there is no amorphous  $\text{TiO}_2$  phase in the product, we calcinated both mesoporous amorphous  $\text{TiO}_2$  and our mesoporous  $\text{SrTiO}_3$  product in air at certain temperatures. Mesoporous amorphous  $\text{TiO}_2$  is calcinated in air at 450 °C for 4h and XRD (**Figure S9b**) shows it crystalized into anatase phase after calcination. However, for the mesoporous  $\text{SrTiO}_3$  product, no other crystalline phase appears even after 8h calcination at 650°C in air (**Figure S10**), confirming  $\text{TiO}_2$  is fully converted to  $\text{SrTiO}_3$  after hydrothermal treatment.

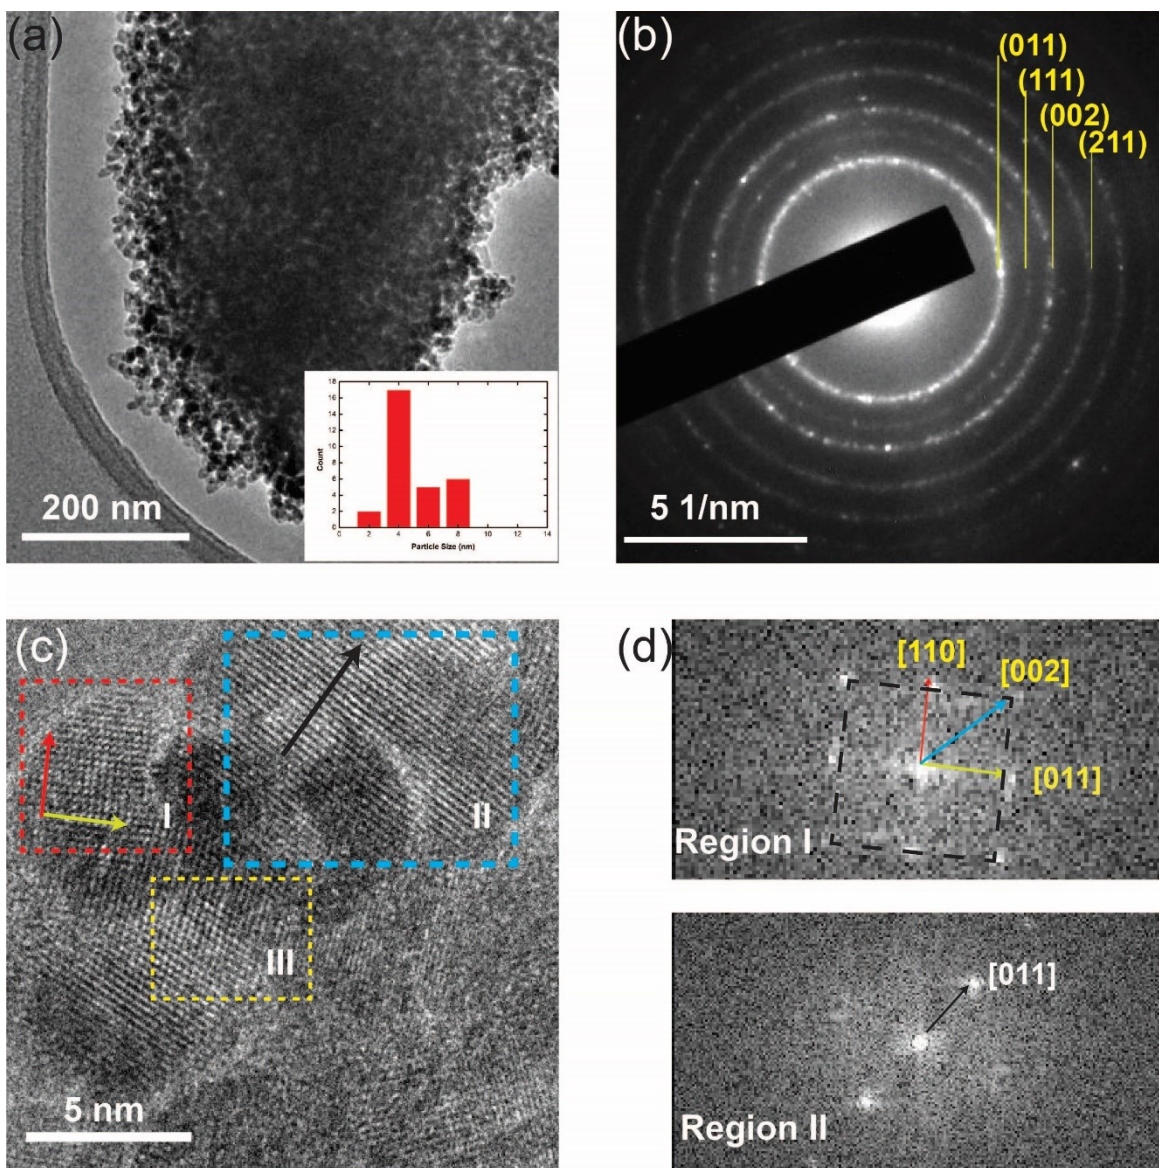

**Figure S8.** (a) TEM with particle distribution (b) Electron diffraction (c) High resolution TEM, (d) Fourier Transform of the High-resolution TEM SrTiO<sub>3</sub> from hydrothermal conversion of carbon filled mesoporous TiO<sub>2</sub>.

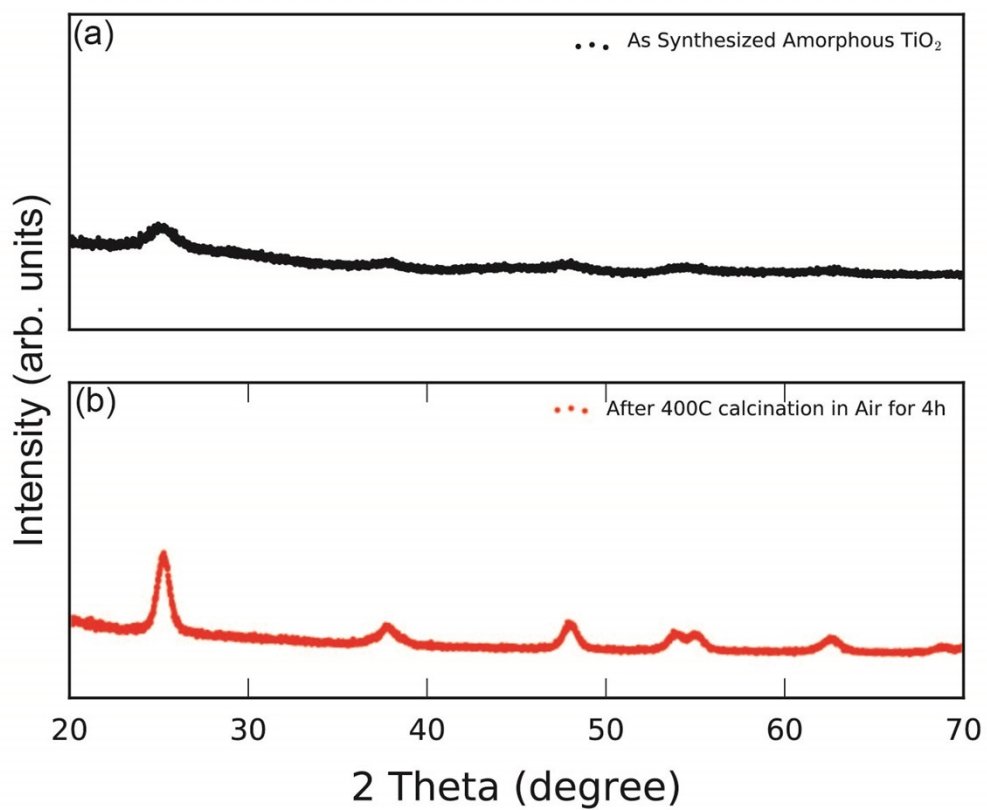

**Figure S9.** XRD for (a) mesoporous amorphous TiO<sub>2</sub> and (b) the product obtained by calcinating mesoporous amorphous TiO<sub>2</sub>.at 450 °C for 4h in air.

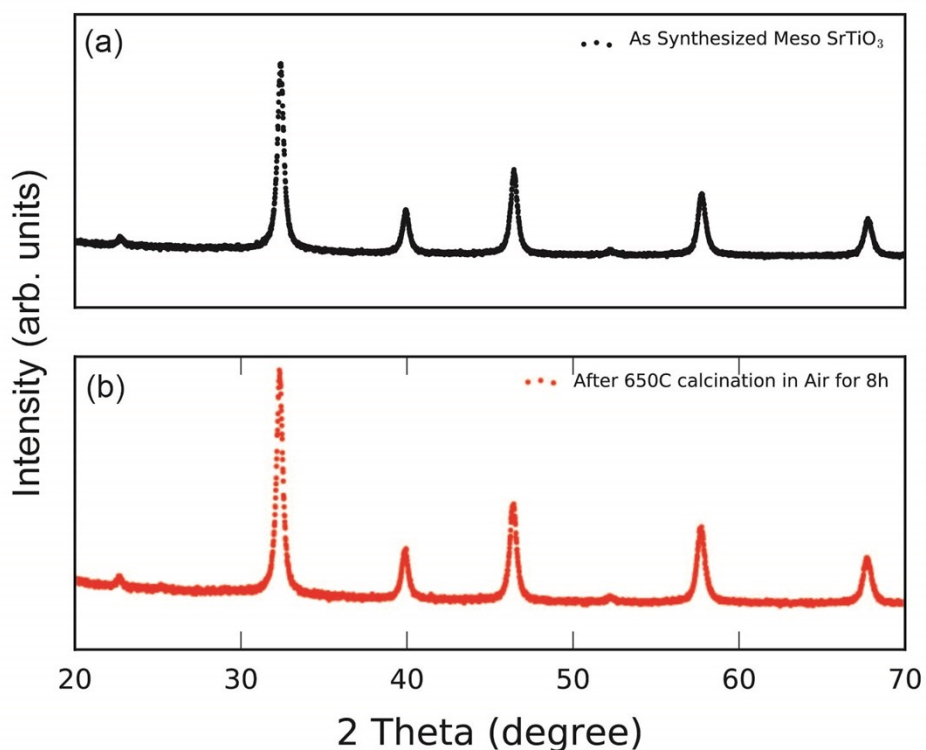

**Figure S10.** XRD for SrTiO<sub>3</sub> from hydrothermal conversion of carbon filled mesoporous amorphous TiO<sub>2</sub> for 24h (a) before and (b) after calcination at 650°C in air for 8h.

| Sample Information                                                                                   | Refined crystal size (nm) | Surface area (m <sup>2</sup> /g) | Pore volume (cm <sup>3</sup> /g) |
|------------------------------------------------------------------------------------------------------|---------------------------|----------------------------------|----------------------------------|
| <b>Crystalline mesoporous TiO<sub>2</sub></b>                                                        | 10.5(2)                   | 205.7                            | 0.345                            |
| <b>SrTiO<sub>3</sub> from direct conversion crystalline mesoporous TiO<sub>2</sub></b>               | 49.1(1)                   | 15                               | 0.0498                           |
| <b>SrTiO<sub>3</sub> from conversion crystalline mesoporous TiO<sub>2</sub> after filling carbon</b> | 16.6(6)                   | 53.2                             | 0.0774                           |
| <b>Amorphous mesoporous TiO<sub>2</sub></b>                                                          | /                         | 213.4                            | 0.309                            |
| <b>SrTiO<sub>3</sub> from conversion Amorphous mesoporous TiO<sub>2</sub> after filling carbon</b>   | 11.6                      | 77.4                             | 0.082                            |

**Table S1.** Refined crystal size, surface area and mean pore size of synthesized mesoporous TiO<sub>2</sub> and SrTiO<sub>3</sub> samples.

## 7. Synthesis of carbon/amorphous TiO<sub>2</sub> composite and their conversion into SrTiO<sub>3</sub>.

### 7.1 Synthesis of carbon/amorphous TiO<sub>2</sub> composite

0.8 g of triblock copolymer Pluronic P127 was first added into 12 mL of anhydrous ethanol (EtOH), followed by the addition of 1.2g acetic acid and 1.2 g concentrated hydrochloric acid (HCl 37%). After stirring for 0.5 h at room temperature, 5 mmol ( $\approx 1.4$  ml) Titanium butoxide Ti(C<sub>4</sub>H<sub>9</sub>O)<sub>4</sub> was slowly added to the solution dropwise. Followed is the addition of certain mass ratio of sucrose into the solution. The above solution was under with vigorous stirring for around 3 h. The resulting sol solution was transferred in an open glass container (diameter 2 inch) and was later placed in a 40 °C environment and a 60 °C environment each for 24 h, allowing the evaporation of the solvent to form gel. The Mesoporous TiO<sub>2</sub> powder was obtained by calcinating the formed gel at 350 °C for 4h (1°C/min ramping) in the N<sub>2</sub> flow environment. Basic characterizations are presented in **Figure S11**.

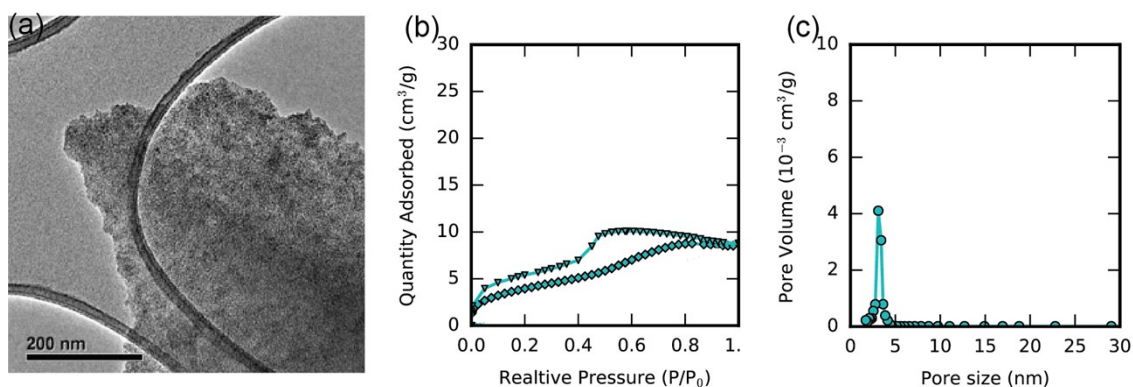

**Figure S11.** (a)TEM, (b) Nitrogen adsorption isotherm and (c) pore size distribution for carbon/amorphous TiO<sub>2</sub> composite.

## 7.2 Filling carbon/amorphous TiO<sub>2</sub> composite with carbon.

0.2g carbon/amorphous TiO<sub>2</sub> composite is added to a solution obtained by dissolving 0.2g of sucrose and 1 drop of H<sub>2</sub>SO<sub>4</sub> (~0.05 ml) 2 ml H<sub>2</sub>O. After 5 min sonication, the mixture is placed in an oven for 6 h at 100°C. Subsequently, the temperature is increased to 180°C and maintained for another 6 h.

## 7.3 Conversion of carbon/amorphous TiO<sub>2</sub> composite to SrTiO<sub>3</sub>.

0.2g carbon/amorphous TiO<sub>2</sub> composite (carbon filled or not) and 0.8g Sr(OH)<sub>2</sub> are mixed in the 15ml water and the mixture undergoes hydrothermal treatment at 200 °C for 24h. The obtained solid is washed first with 5% acetic acid solution for 3 times to remove unreacted Sr(OH)<sub>2</sub> and BaCO<sub>3</sub> then with water for another 3 times. The product is dried in air at 80°C. The final BaTiO<sub>3</sub> product is obtained after 4h calcination at 450 °C in air to remove the carbon. Figure **S12** shows comparison of Nitrogen adsorption and pore size distribution data of SrTiO<sub>3</sub> converted from carbon/amorphous TiO<sub>2</sub> composite and carbon filled carbon/amorphous TiO<sub>2</sub> composite. TEM image of SrTiO<sub>3</sub> converted from carbon/amorphous TiO<sub>2</sub> composite is displayed in Figure **S13**. TEM image of SrTiO<sub>3</sub> converted from carbon filled carbon/amorphous TiO<sub>2</sub> composite is displayed in Figure **S14**. Comparison of Nitrogen adsorption and pore size distribution data of SrTiO<sub>3</sub> converted from d carbon filled carbon/amorphous TiO<sub>2</sub> composite and carbon filled mesoporous amorphous TiO<sub>2</sub> is presented in Figure **S15**. Carbon/amorphous TiO<sub>2</sub> composite in the characterization here is synthesized via 1:10 sucrose/titanium butoxide ratio.

| Sample Information                                                                       | Refined crystal size (nm) | Surface area (m <sup>2</sup> /g) | Pore volume (cm <sup>3</sup> /g) |
|------------------------------------------------------------------------------------------|---------------------------|----------------------------------|----------------------------------|
| TiO <sub>2</sub> /C composite from 1:10 sucrose/titanium butoxide ratio                  | /                         | 14.14                            | 0.0115                           |
| SrTiO <sub>3</sub> from direct conversion of TiO <sub>2</sub> /C composite               | 23.7                      | 54.3                             | 0.2018                           |
| SrTiO <sub>3</sub> from conversion of TiO <sub>2</sub> /C composite after filling carbon | 16.6                      | 73.4                             | 0.1708                           |

**Table S2.** Refined crystal size, surface area and mean pore size of synthesized TiO<sub>2</sub>/C composite and its converted SrTiO<sub>3</sub> samples.

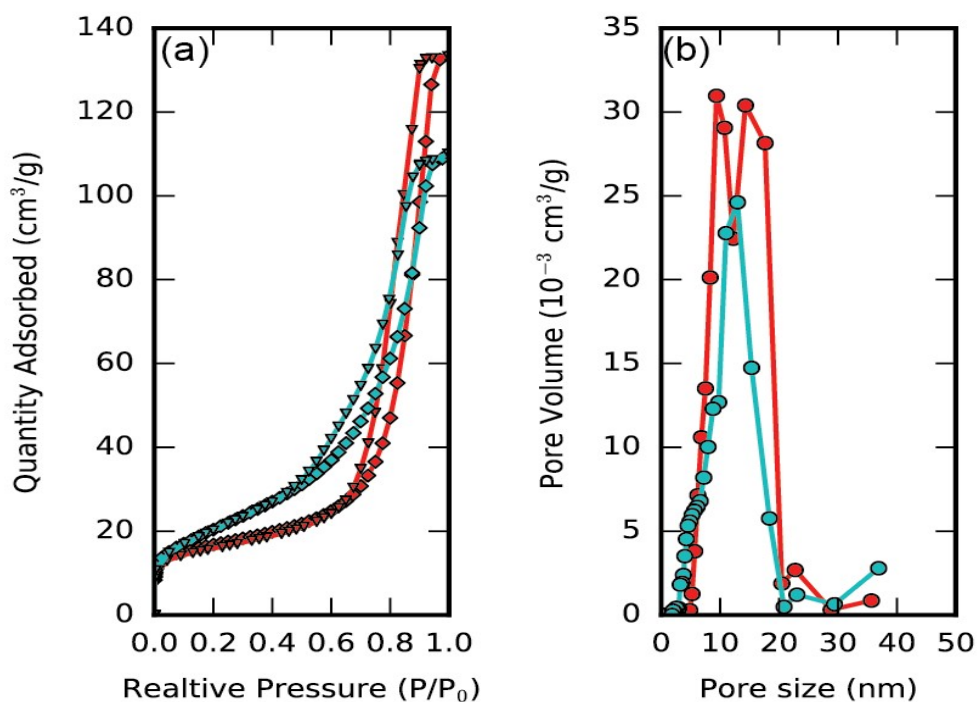

**Figure S12.** Nitrogen adsorption isotherm (left) and pore size distribution(right) of mesoporous SrTiO<sub>3</sub> from direct hydrothermal conversion of TiO<sub>2</sub>/C composite (red curve). crystalline TiO<sub>2</sub>. Mesoporous SrTiO<sub>3</sub> from hydrothermal conversion of TiO<sub>2</sub>/C composite after filling carbon (blue curve).

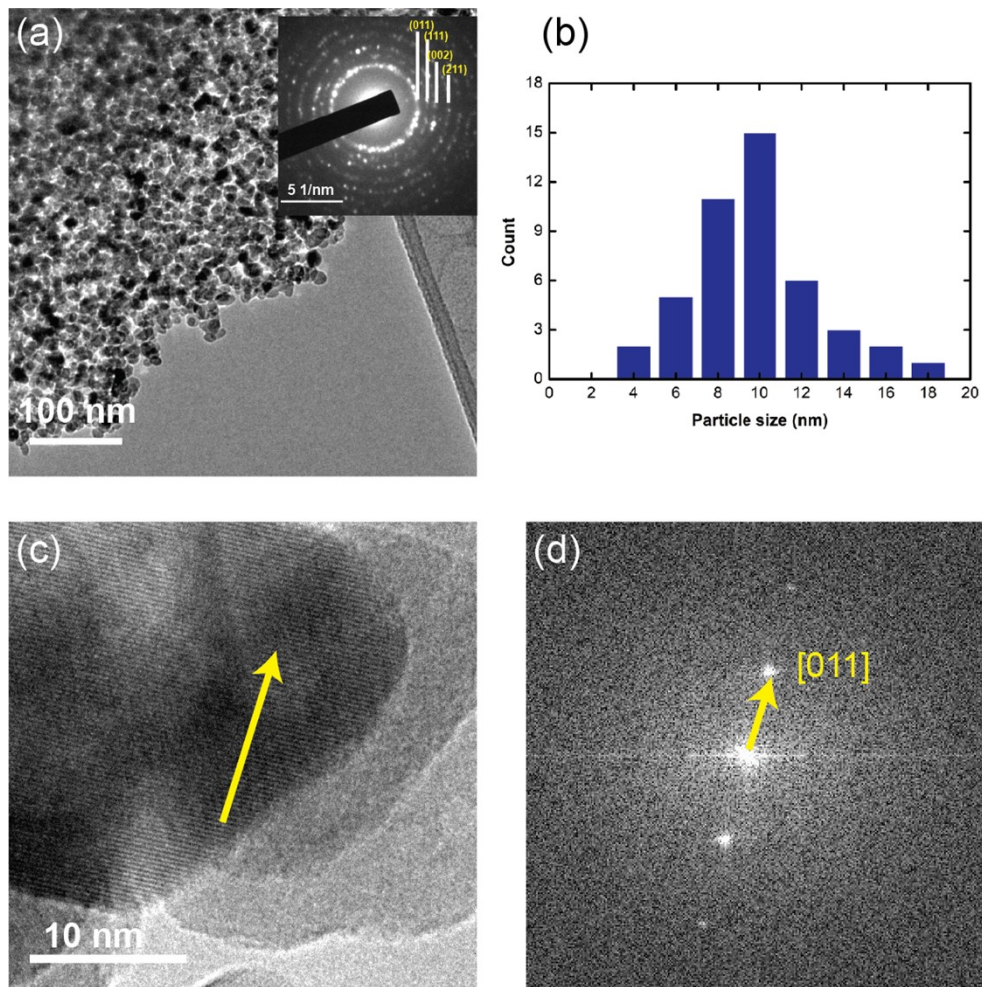

**Figure S13.** (a) TEM, (b) grain size distribution, (c) High resolution TEM, (d) Fourier Transform of the High-resolution TEM SrTiO<sub>3</sub> from hydrothermal conversion of TiO<sub>2</sub>/C composite.



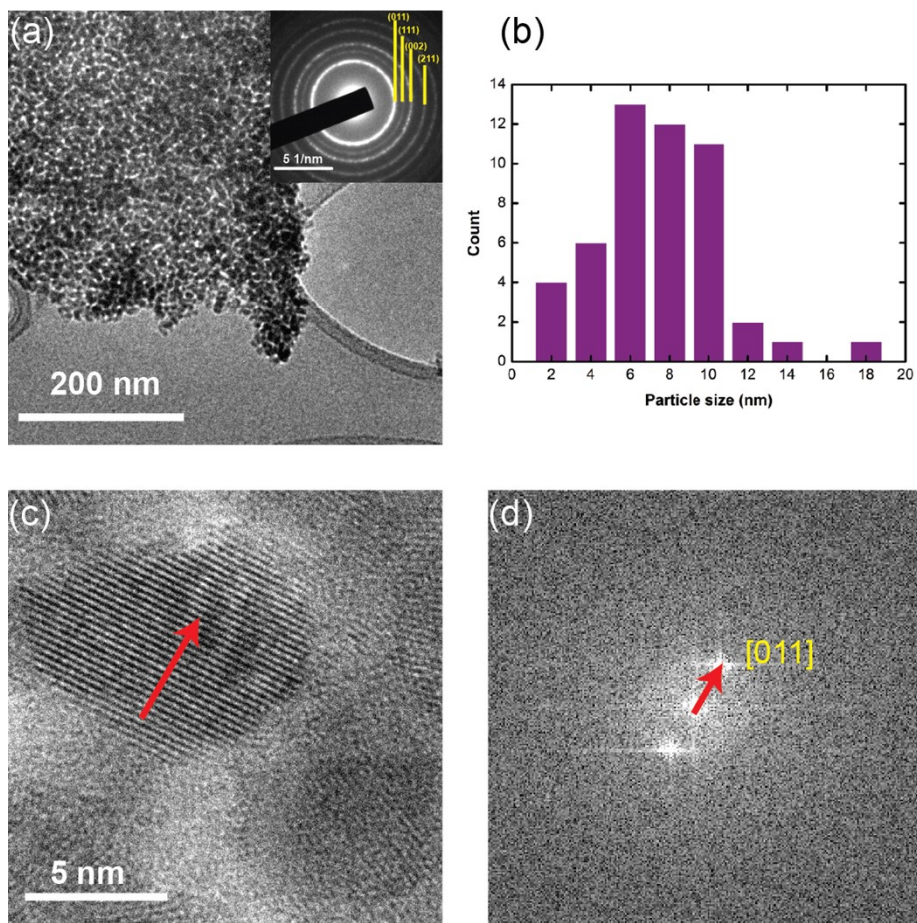

**Figure S14.** (a) TEM, (b) grain size distribution, (c) High resolution TEM, (d) Fourier Transform of the High-resolution TEM  $\text{SrTiO}_3$  from hydrothermal conversion of  $\text{TiO}_2/\text{C}$  composite after carbon filling.



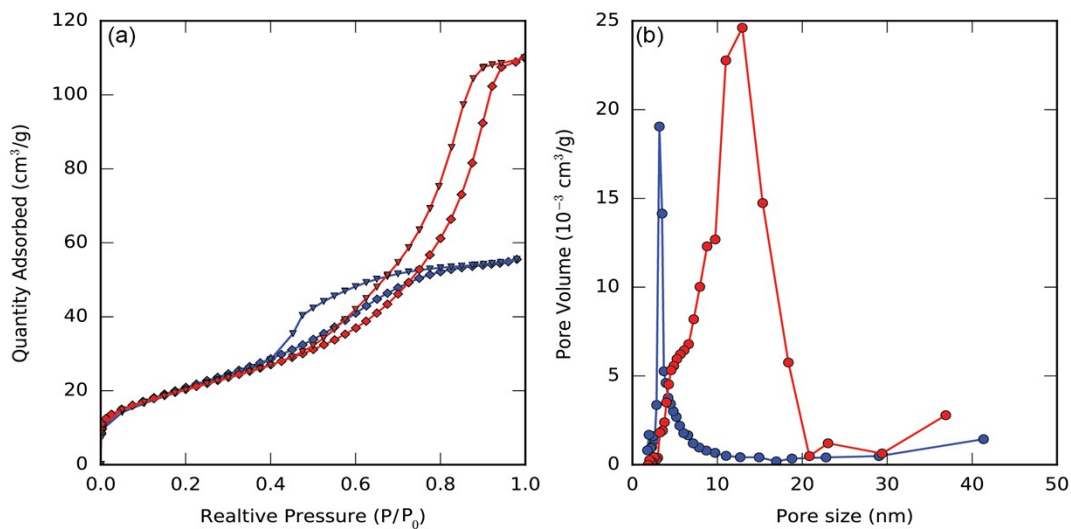

**Figure S15.** Nitrogen adsorption isotherm (left) and pore size distribution(right) of mesoporous SrTiO<sub>3</sub> from hydrothermal conversion of Mesoporous SrTiO<sub>3</sub> from hydrothermal conversion of TiO<sub>2</sub>/C composite after filling carbon (red curve). Mesoporous SrTiO<sub>3</sub> from hydrothermal conversion of carbon filled mesoporous amorphous TiO<sub>2</sub> for 24h (blue curve).

| Mass Ratio (titanium butoxide vs. sucrose)  | Mean pore size(nm) | Surface area (m <sup>2</sup> /g) | Surface area (m <sup>2</sup> /mol) | Pore volume (cm <sup>3</sup> /g) | Pore volume (cm <sup>3</sup> /mol) |
|---------------------------------------------|--------------------|----------------------------------|------------------------------------|----------------------------------|------------------------------------|
| 1:10                                        | 3.9                | 73.4                             | 13465.964                          | 0.17                             | 31.1882                            |
| 0.75:10                                     | 4.1                | 127.8                            | 23446.188                          | 0.18                             | 33.0228                            |
| 0.5:10                                      | 5.2                | 111.2                            | 20400.752                          | 0.15                             | 27.519                             |
| 0.25:10                                     | 7.6                | 81.5                             | 14951.99                           | 0.15                             | 27.519                             |
| 0.125:10                                    | 9.7                | 109.7                            | 20125.562                          | 0.11                             | 20.1806                            |
| 0:10                                        | 12.8               | 77.4                             | 14199.804                          | 0.082                            | 15.04372                           |
| Comparison                                  |                    |                                  |                                    |                                  |                                    |
| <b>Amorphous mesoporous TiO<sub>2</sub></b> | <b>6.1</b>         | <b>213.4</b>                     | <b>16008.38</b>                    | <b>0.309</b>                     | <b>56.68914</b>                    |

**Table S3.** Comparison of mean pore size, surface area and pore volume of SrTiO<sub>3</sub> from hydrothermal conversion of carbon filled TiO<sub>2</sub>/C composite when different sucrose/titanium butoxide ratio is used for the synthesis of TiO<sub>2</sub>/C composite.

## 8. Hydrothermal conversion of carbon filled mesoporous amorphous $\text{TiO}_2$ into $\text{BaTiO}_3$ .

0.2g carbon filled amorphous  $\text{C}/\text{TiO}_2$  and 1g  $\text{Ba}(\text{OH})_2$  are mixed in the 15ml water and the mixture undergoes hydrothermal treatment at 200 °C for 24h. The obtained solid is washed first with 5% acetic acid solution for 3 times to remove unreacted  $\text{Ba}(\text{OH})_2$  and  $\text{BaCO}_3$  then with water for another 3 times. The product is dried in air at 80°C. The final  $\text{BaTiO}_3$  product is obtained after 4h calcination at 450 °C in air to remove the carbon. Characterizations of  $\text{BaTiO}_3$  using 0.5:10 sucrose/titanium butoxide ratio are shown in **Figure S16**. Comparison of Nitrogen adsorption and pore size distribution data of  $\text{BaTiO}_3$  synthesized using different

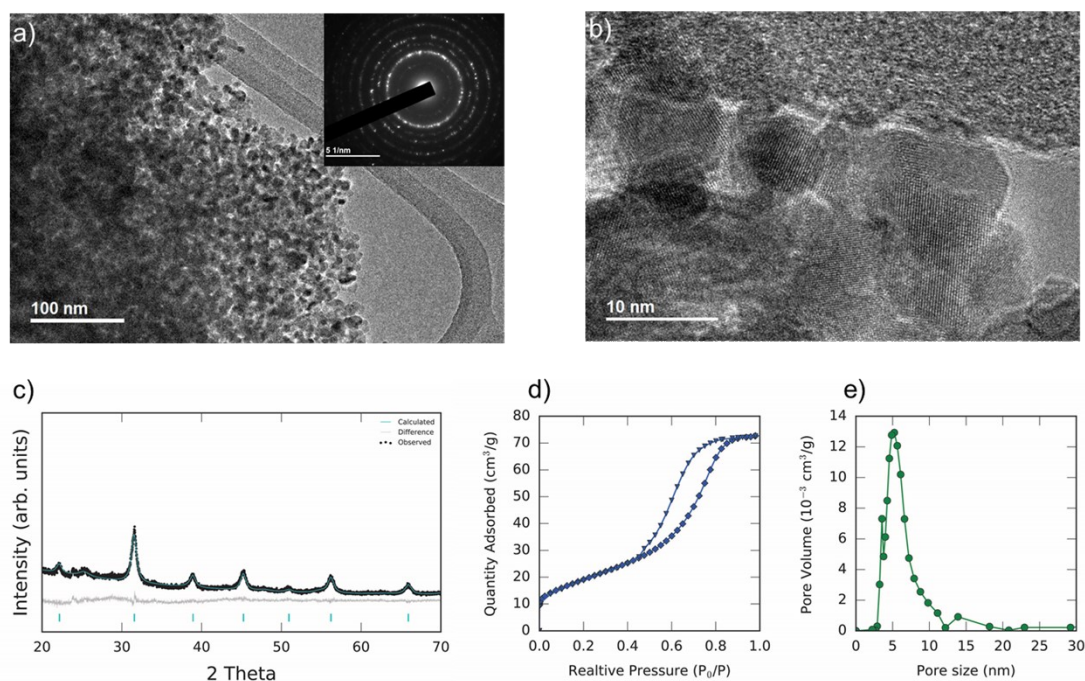

**Figure S16.** (a)TEM, (b) High resolution TEM, (c) XRD with Rietveld refinement, (d)Nitrogen adsorption isotherm and (e) pore size distribution for  $\text{BaTiO}_3$  from hydrothermal conversion of  $\text{TiO}_2/\text{C}$  composite after filling carbon.

sucrose/titanium butoxide ratio is shown in **Figure S17**.



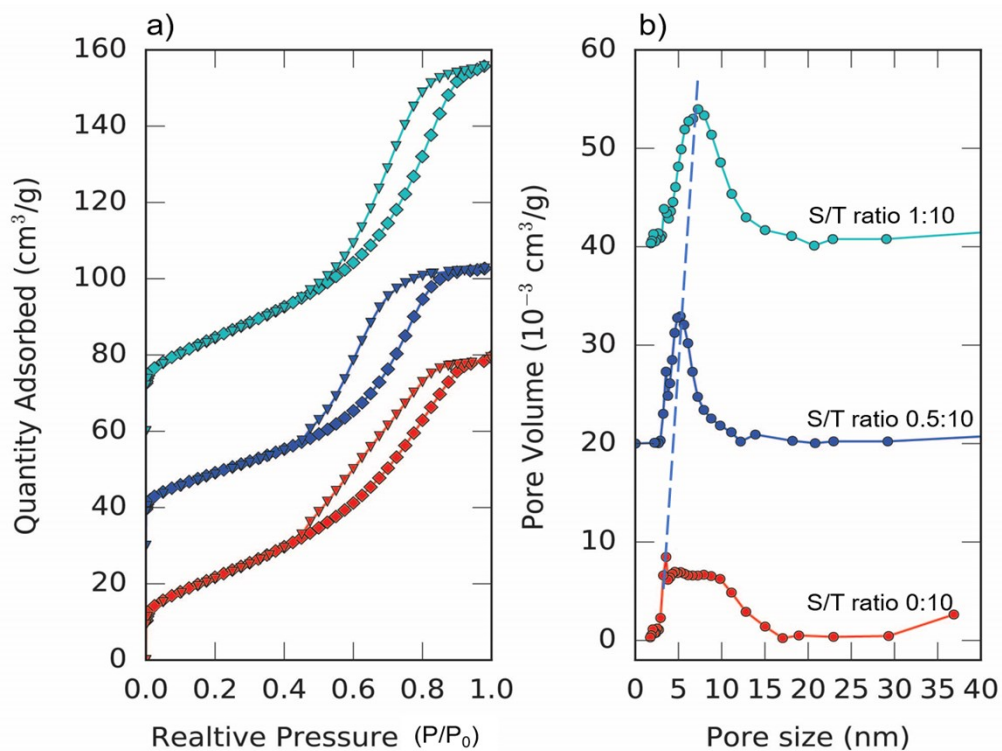

**Figure S17.** Nitrogen adsorption isotherm (left) and pore size distribution(right) of mesoporous BaTiO<sub>3</sub> from hydrothermal conversion carbon filled TiO<sub>2</sub>/C composite when different sucrose/titanium butoxide ratio is used for the synthesis of TiO<sub>2</sub>/C composite.

| Mass Ratio (titanium butoxide vs. sucrose) | Mean pore size (nm) | Surface area (m <sup>2</sup> /g) | Surface area (m <sup>2</sup> /mol) | Pore volume (cm <sup>3</sup> /g) | Pore volume (cm <sup>3</sup> /mol) |
|--------------------------------------------|---------------------|----------------------------------|------------------------------------|----------------------------------|------------------------------------|
| 0:10                                       | 3.2                 | 68.8                             | 16093.696                          | 0.113                            | 26.350696                          |
| 0.5:10                                     | 5.4                 | 80.27                            | 18776.7584                         | 0.122                            | 28.449424                          |
| 1:10                                       | 7.6                 | 88.78                            | 20767.4176                         | 0.149                            | 34.745608                          |
| Comparison                                 |                     |                                  |                                    |                                  |                                    |
| amorphous mesoporous TiO <sub>2</sub>      | 6.1                 | 213.4                            | 16008.38                           | 0.309                            | 56.68914                           |

**Table S4.** Comparison of mean pore size, surface area and pore volume of BaTiO<sub>3</sub> from hydrothermal conversion of carbon filled TiO<sub>2</sub>/C composite when different sucrose/titanium butoxide ratio is used for the synthesis of TiO<sub>2</sub>/C composite.

## 9. Hydrothermal conversion of carbon filled mesoporous amorphous $\text{TiO}_2$ into $\text{Li}_2\text{TiO}_3$ .

0.2g carbon filled amorphous  $\text{C}/\text{TiO}_2$  (from 0.5:10 sucrose/titanium butoxide ratio) and 1g  $\text{LiOH}$  are mixed in the 15ml water and the mixture undergoes hydrothermal treatment at  $200^\circ\text{C}$  for 24h. The obtained solid is washed first with 5% acetic acid solution for 3 times to remove unreacted  $\text{LiOH}$  and  $\text{BaCO}_3$  then with water for another 3 times. The product is dried in air at  $80^\circ\text{C}$ . The final  $\text{Li}_2\text{TiO}_3$  product is obtained after 4h calcination at  $450^\circ\text{C}$  in air to remove the carbon. Characterizations are shown in **Figure S18**. The XRD indicates the  $\text{Li}_2\text{TiO}_3$  is a

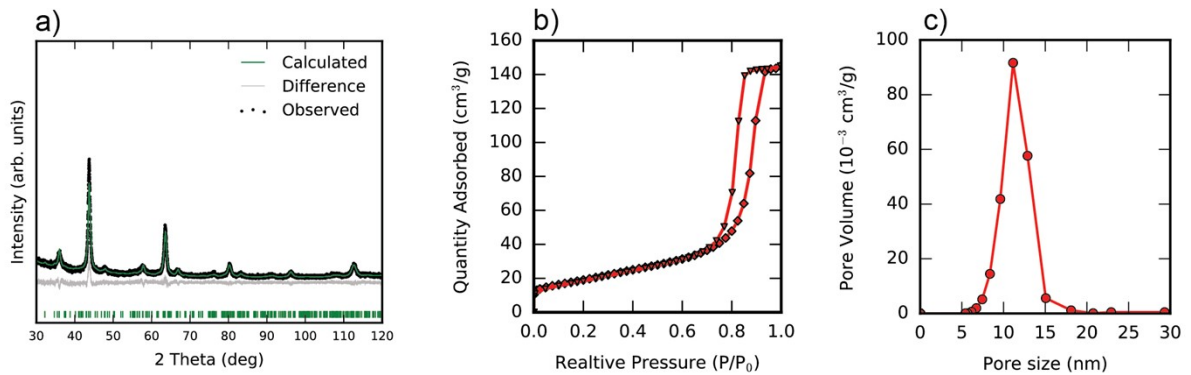

**Figure S18.** (a) XRD with its refinement (b) Nitrogen adsorption isotherm and (c) pore size distribution for  $\text{Li}_2\text{TiO}_3$  from hydrothermal conversion of  $\text{TiO}_2/\text{C}$  composite after filling carbon.

monoclinic phase.

| System         | S <sub>bet</sub> (m <sup>2</sup> /g) | Reference |
|----------------|--------------------------------------|-----------|
| Mesoporous#    | 127                                  | This work |
| Mesoporous     | 30-50*                               | 4         |
| Mesoporous     | 89.2                                 | 5         |
| Nano particle# | 11.2                                 | 6         |
| Nano particle  | 42                                   | 7         |
| Nano particle  | 20.8                                 | 8         |
| Aerogel        | 175                                  | 9         |
| Aerogel        | 370                                  | 10        |
| Nano particle  | 27.4                                 | 11        |
| Mesoporous     | 83                                   | 12        |
| Mesoporous     | 108                                  | 13        |
| Nano particle  | 18.5                                 | 14        |
| Nano particle  | 21                                   | 15        |
| Nano particle  | 37.4                                 | 16        |
| Mesoporous     | 120                                  | 17        |
| Nano particle  | 14                                   | 18        |
| Nano particle  | 20                                   | 19        |

**Table S5.** Comparison of Surface areas of reported representative high surface area SrTiO<sub>3</sub> materials. #Mesoporous and nanoparticles are usually used together in the literature. \* The study did not report BET surface area. However, they did nitrogen adsorption measurement. So we estimated the BET surface from their nitrogen adsorption isotherm curves.

#### References:

- 1 R. W. Cheary and A. Coelho, *J. Appl. Crystallogr.*, 1992, **2**, 109–121.
- 2 R. Liu, Y. Ren, Y. Shi, F. Zhang, L. Zhang, B. Tu and D. Zhao, *Chem. Mater.*, 2008, **20**, 1140–1145.
- 3 J. Liu, S. Pancera, V. Boyko, A. Shukla, T. Narayanan and K. Huber, *Langmuir*, 2010, **26**,



17405–17412.

- 4 B. Huang, Y. Liu, Q. Pang, X. Zhang, H. Wang and P. K. Shen, *J. Mater. Chem. A*, 2020, **8**, 22251–22256.
- 5 X. Wei, G. Xu, Z. Ren, Y. Wang, G. Shen and G. Han, *J. Am. Ceram. Soc.*, 2008, **91**, 299–302.
- 6 † Yawen Wang, † Hua Xu, † Xiaobing Wang, † Xi Zhang, † Huimin Jia, \*,† and Lizhi Zhang and J. Qiu‡, *J. Phys. Chem. B*, 2006, **110**, 13835–13840.
- 7 U. Sulaeman, S. Yin and T. Sato, *Appl. Catal. B Environ.*, 2011, **105**, 206–210.
- 8 Q. Kuang and S. Yang, *ACS Appl. Mater. Interfaces*, 2013, **5**, 3683–3690.
- 9 D. Demydov and K. J. Klabunde, *J. Non. Cryst. Solids*, 2004, **350**, 165–172.
- 10 F. Rechberger, G. Ilari, C. Willa, E. Tervoort and M. Niederberger, *Mater. Chem. Front.*, 2017, **1**, 1662–1667.
- 11 K. Klauke, B. Kayaalp, M. Biesuz, A. Iannaci, V. M. Sglavo, M. D'Arienzo, S. Lee, J. Seo, W. Jung and S. Mascotto, *ChemNanoMat*, 2019, **5**, 948–956.
- 12 L. F. Da Silva, L. J. Q. Maia, M. I. B. Bernardi, J. A. Andrés and V. R. Mastelaro, *Mater. Chem. Phys.*, 2011, **125**, 168–173.
- 13 X. Wei, G. Xu, Z. Ren, C. Xu, W. Weng, G. Shen and G. Han, *J. Am. Ceram. Soc.*, 2010, **93**, 1297–1305.
- 14 J. Wang, S. Yin, Q. Zhang, F. Saito and T. Sato, *Solid State Ionics*, 2004, **172**, 191–195.
- 15 Q. Kuang and S. Yang, *ACS Appl. Mater. Interfaces*, 2013, **5**, 3683–3690.
- 16 W. Zhao, H. Wang, N. Liu, J. Rong, Q. Zhang, M. Li and X. Yang, *J. Am. Ceram. Soc.*, 2019, **102**, 981–987.

- 17 H. Zhan, Z.-G. Chen, J. Zhuang, X. Yang, Q. Wu, X. Jiang, C. Liang, M. Wu and J. Zou, *J. Phys. Chem. C*, 2015, **119**, 3530–3537.
- 18 G. S. Foo, Z. D. Hood and Z. Wu, *ACS Catal.*, 2017, **8**, 555–565.
- 19 J. A. Enterkin, W. Setthapun, J. W. Elam, S. T. Christensen, F. A. Rabuffetti, L. D. Marks, P. C. Stair, K. R. Poepelmeier and C. L. Marshall, *ACS Catal.*, 2011, **1**, 629–635.
